# Supplementary material
Source: PubMed Central journal article supplement (PMC7962874)
Supplement: NIHMS1678569-supplement-Supplemental_figures_and_figure_legends.pdf [file NIHMS1678569-supplement-Supplemental_figures_and_figure_legends.pdf]

**SUPPLEMENTAL FIGURES AND FIGURE LEGENDS:**

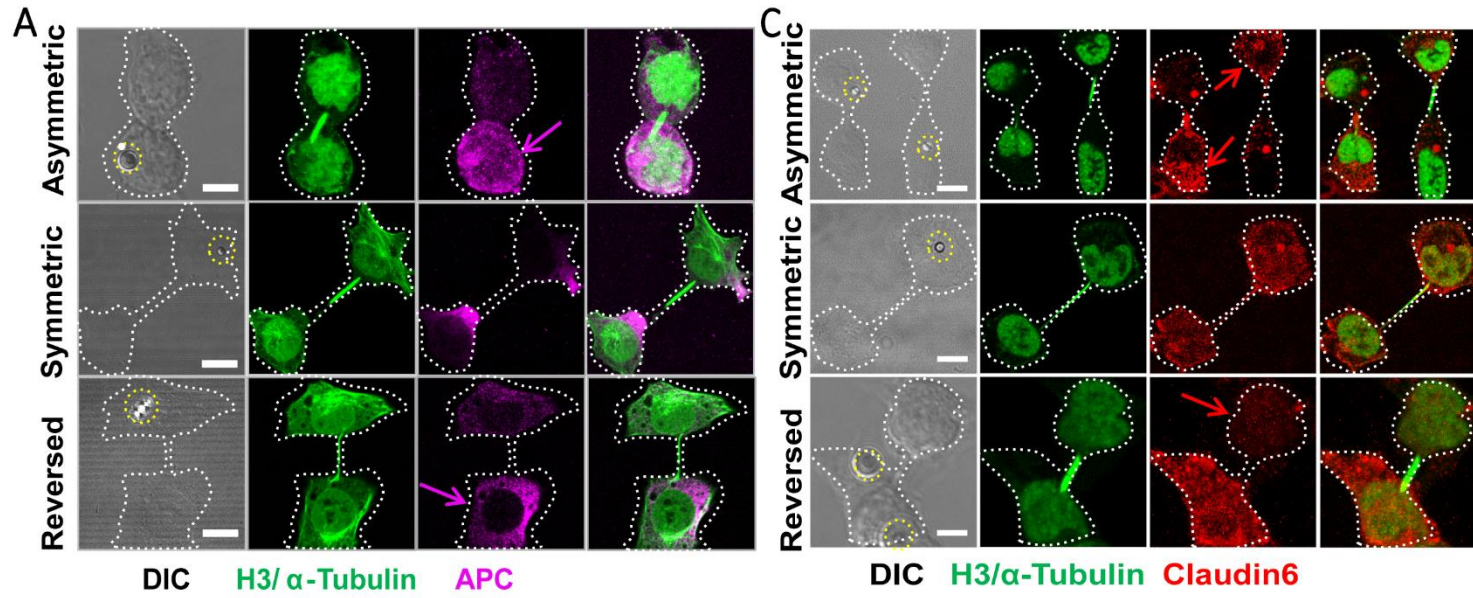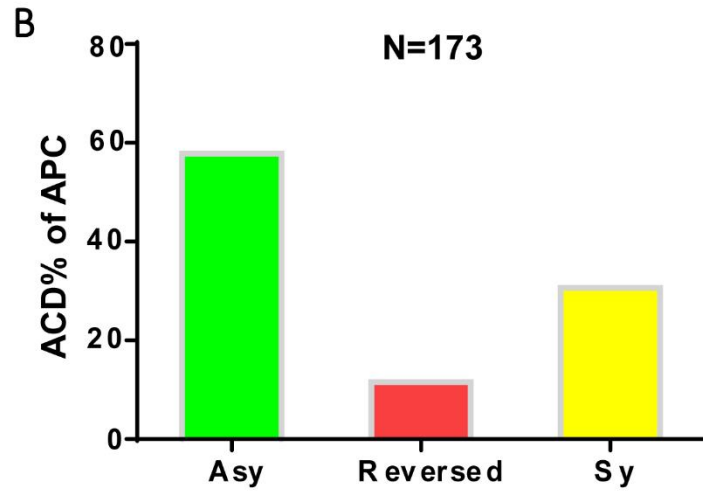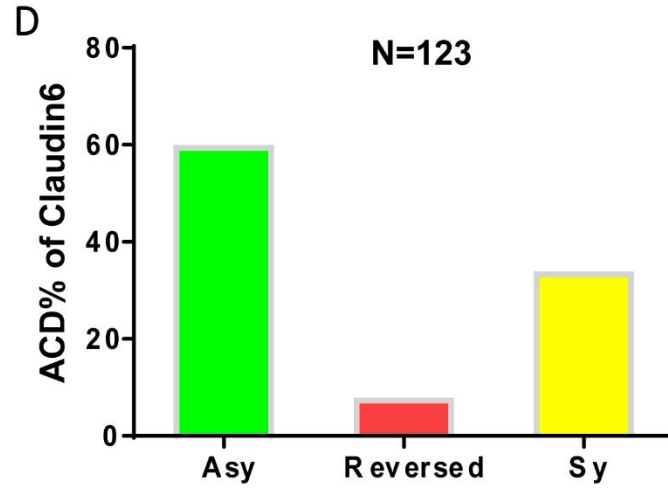

**Figure S1: Wnt3a beads induce ACD of *H3-Dendra2* transgenic mESCs. Related to Figure 1.** (A) Representative images of mitotic (telophase) or post-mitotic mESCs carrying *H3-Dendra2* transgene with Wnt3a beads and immunostained with antibodies against  $\alpha$ -Tubulin (green) and APC (Magenta). H3-Dendra2 fusion protein (green). Yellow dotted circles outline the position of Wnt3a beads. Magenta arrows indicate the proximal side toward Wnt3a bead. All three patterns are shown: asymmetric, symmetric and reversed asymmetric. (B) The corresponding ratios of asymmetric (57.80%), symmetric (30.64%) and reversed asymmetric (11.56%) cell division patterns ( $N= 173$ ). (C) Representative images of mitotic (telophase) or post-mitotic mESCs carrying *H3-Dendra2* transgene with Wnt3a beads and immunostained with antibodies against  $\alpha$ -Tubulin (green) and Claudin6 (Red). H3-Dendra2 fusion protein (green). Yellow dotted circles outline the position of Wnt3a beads. Red arrows indicate the distal side from Wnt3a bead. All three patterns are shown: asymmetric, symmetric and reversed asymmetric. (D) The corresponding ratios of asymmetric (59.35%), symmetric (33.33%) and reversed asymmetric (7.32%) cell division patterns ( $N= 123$ ). Scale bars in (A) and (C): 5  $\mu$ m.

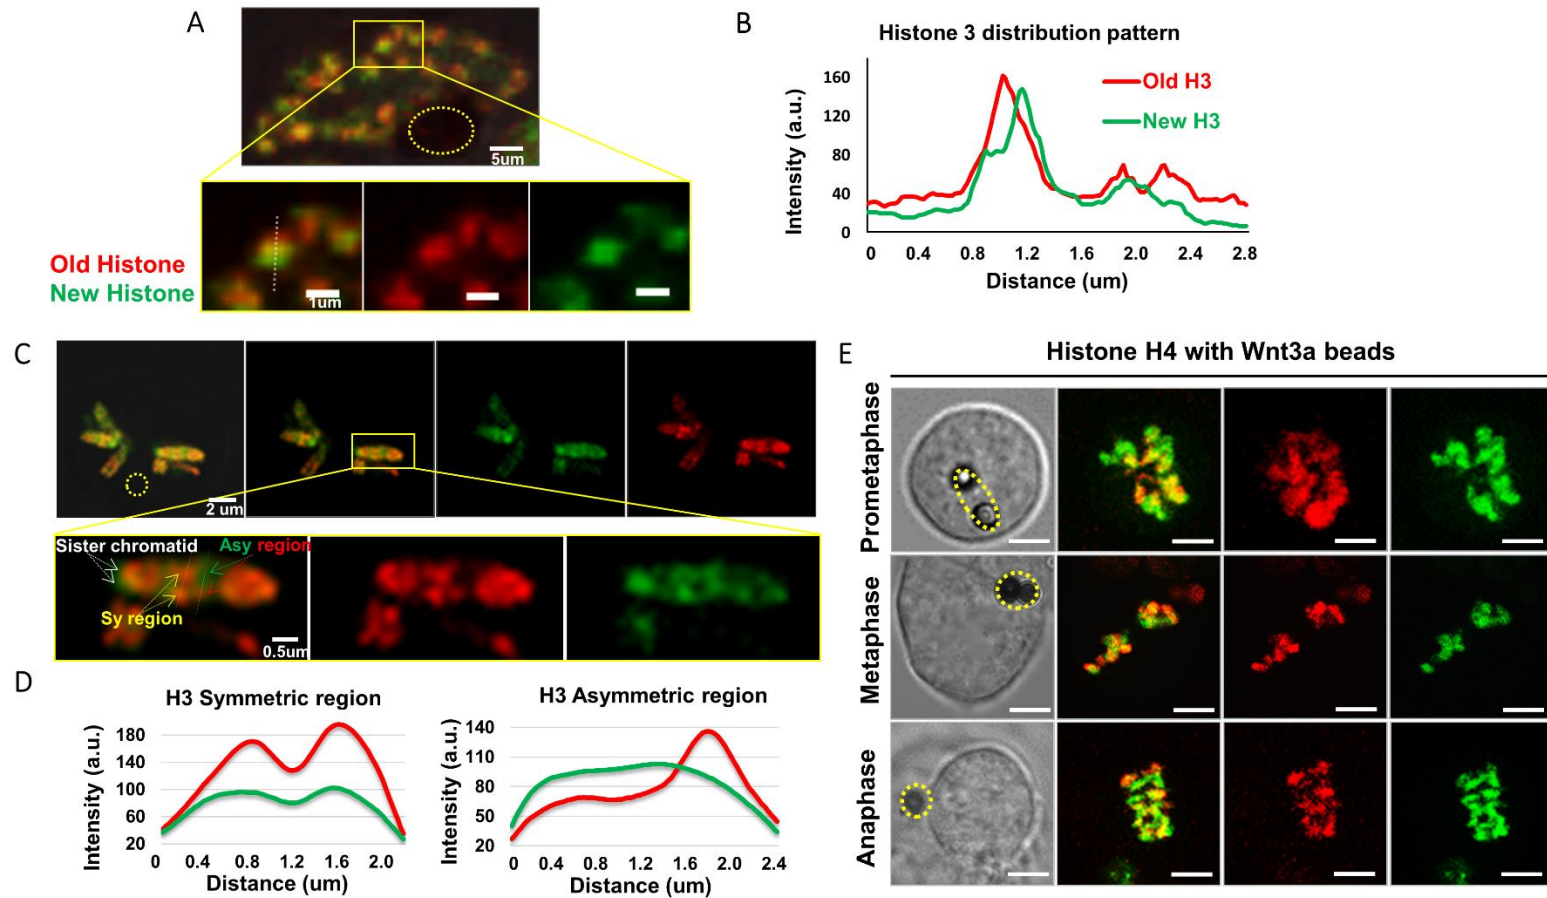

**Figure S2: Local non-overlapping old *versus* new histone H3 and H4 distribution in mitotic mESCs with Wnt3a beads. Related to Figure 1.** (A) Non-overlapping subdomains of old (red) *versus* new (green) histone H3 in a prophase mESC during the second mitosis after photoconversion (Figure 1C), in the presence of Wnt3a beads. (B) The line plots at these regions shows non-overlapping

peaks of old H3 *versus* new H3 were separable at approximately 0.25 $\mu$ m (250 nm), which is above the spatial resolution of confocal light microscopy at 200-230nm. **(C)** Non-overlapping subdomains of old H3 *versus* new H3 in a prometaphase mESC during the second mitosis after photoconversion of histone-Dendra2 (Figure 1C), in the presence of Wnt3a beads. **(D)** The line plots show both symmetric and asymmetric old H3 *versus* new H3 domains between condensed sister chromatids. **(E)** Non-overlapping subdomains of old (red) *versus* new (green) histone H4 in mESCs at prometaphase, metaphase, and anaphase mESCs, during the second mitosis after photoconversion of histone-Dendra2 (Figure 1C), in the presence of Wnt3a beads. Yellow dotted circles outline the position of Wnt3a beads in **(A)**, **(C)** and **(E)**. Scale bars in **(A)** and **(E)**: 5  $\mu$ m; **(C)**: 2  $\mu$ m. Scale bars in **(A)** inset: 1  $\mu$ m; **(C)** inset: 0.5  $\mu$ m.

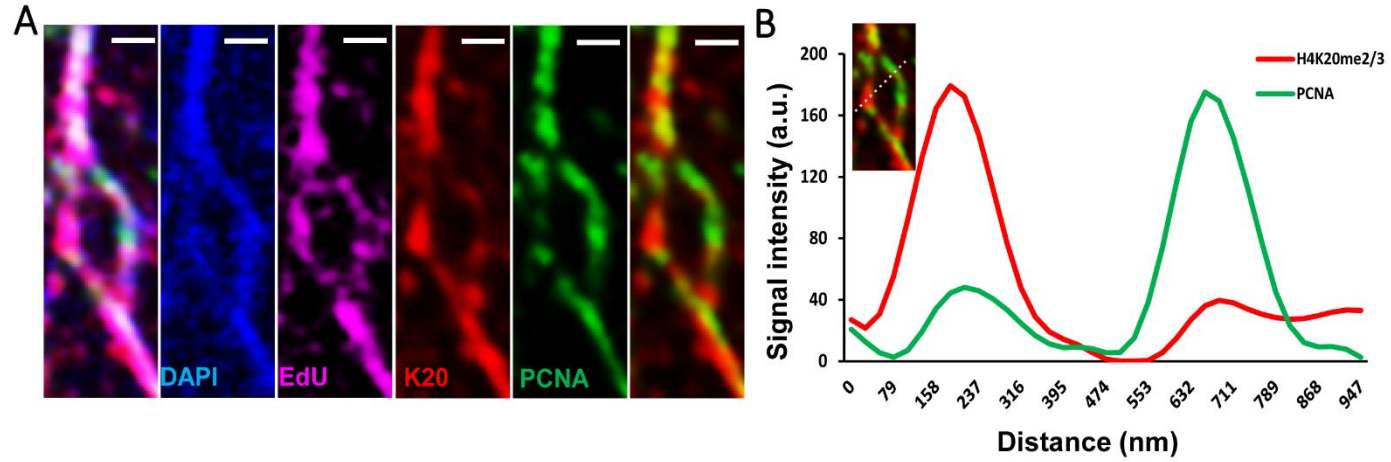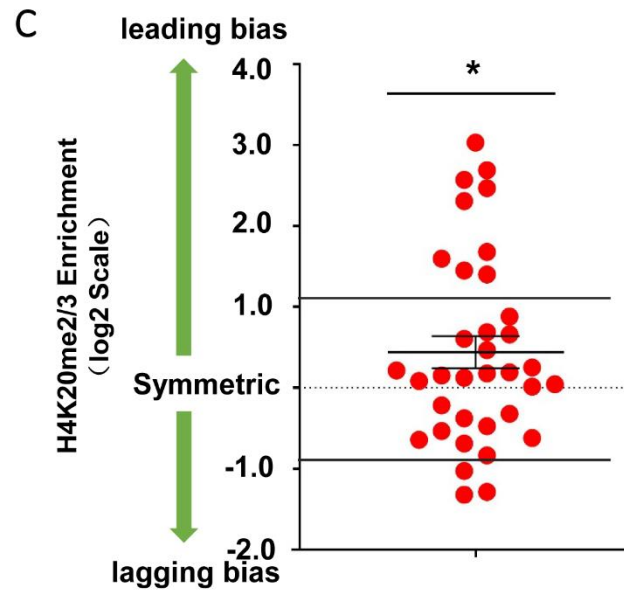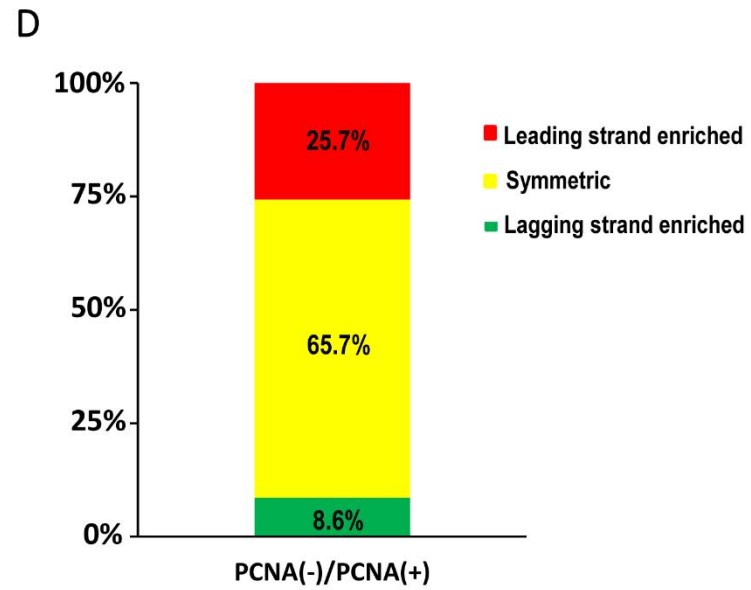

**Figure S3: Old histone-enriched H4K20me2/3 shows preferentially leading-strand distribution on chromatin fibers from mESCs with Wnt3a beads. Related to Figure 2.** (A) Airyscan images of chromatin fiber labeled with EdU (magenta) to show the replicative regions with asymmetric distribution of H4K20me2/3 (red) and PCNA (green) at the opposite strands. DNA label DAPI (blue). (B) The line plots show the leading strand-enriched (i.e. PCNA-less side) H4K20me2/3 distribution between replicative sister chromatids that is separable in (A). (C) Quantification of the  $\log_2$  (H4K20me2/3 signal at PCNA-less leading strand/ H4K20me2/3 signal at PCNA-enriched lagging strand) using chromatin fibers from mESCs without Wnt3a beads. The average  $\log_2$  ratio=  $0.4393 \pm 0.1984$  (average  $\pm$  SEM,  $N= 35$  replicative chromatin fibers), which is significantly different from the symmetric distribution pattern with  $\log_2$  ratio= 0. \*  $P < 0.05$  based on Mann-Whitney test. Two dotted lines indicate the symmetric range for H4K20me2/3 distribution between sister chromatids [see STAR methods and (Wooten et al., 2019) to define this range]. (D) The percentages of leading strand enriched ( $\log_2$  ratio  $> 1.025$ , ratio  $> 2.035$ ), symmetric ( $-0.953 < \log_2$  ratio  $< 1.025$ ,  $0.517 < \text{ratio} < 2.035$ ) and lagging strand enriched ( $\log_2$  ratio  $< -0.953$ , ratio  $< 0.517$ ) using data points from (C). Scale bars in (A): 500 nm.



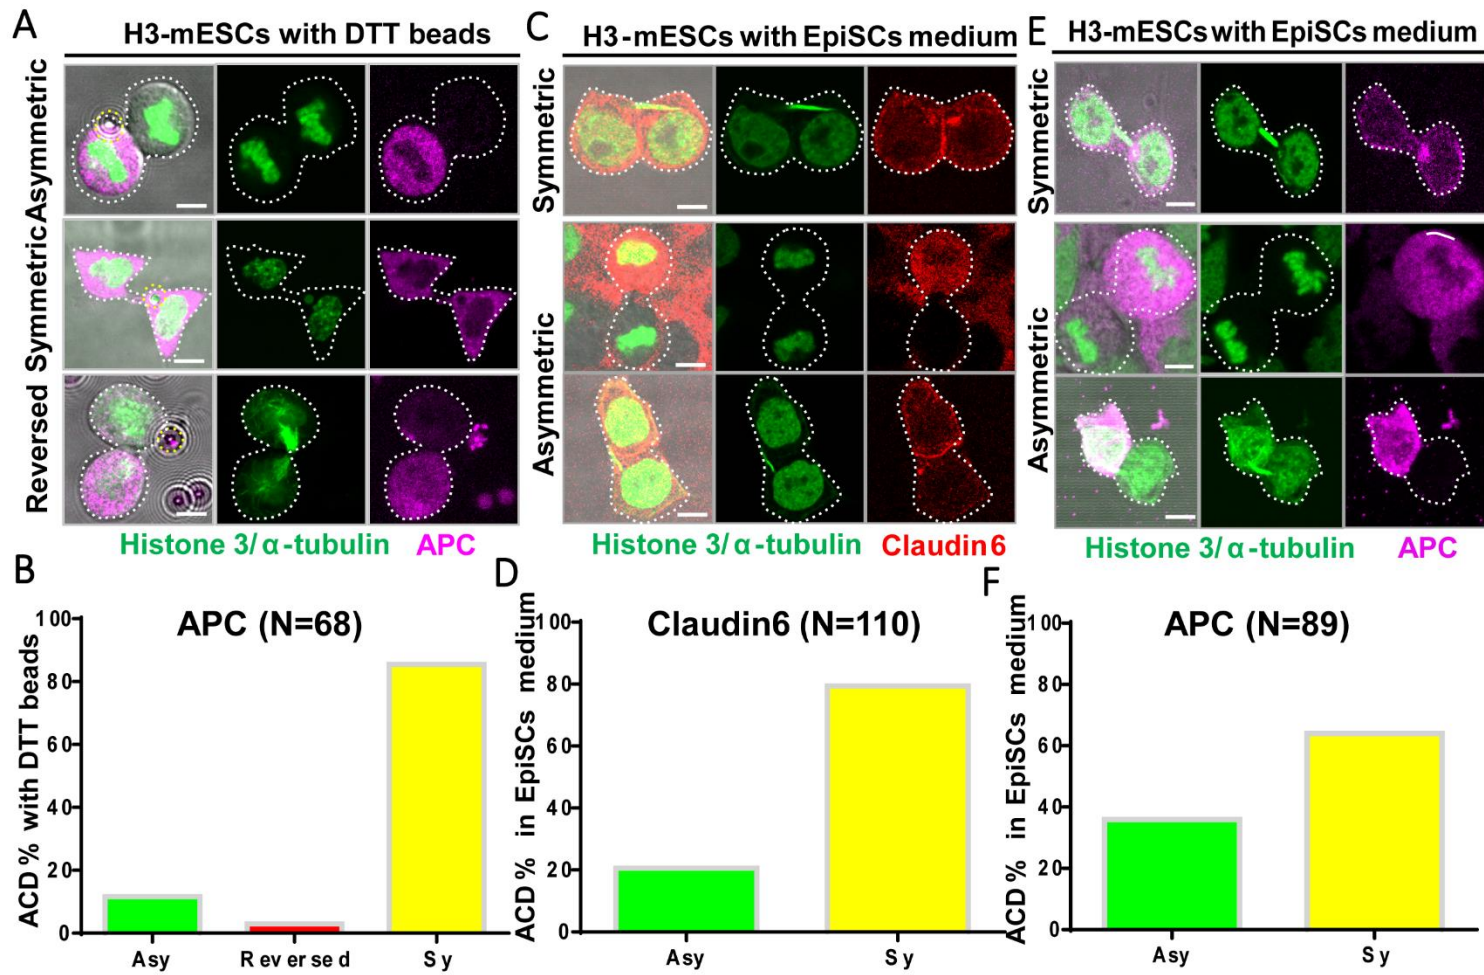

**Figure S4: Decreased ACD of mESCs with DTT-inactivated Wnt3a beads or in differentiation-promoting EpiSC medium.**

Related to Figure 3 and 4. (A) Representative images of mitotic (telophase) or post-mitotic mESCs carrying *H3-Dendra2* transgene

with Wnt3a beads treated with DTT and immunostained with antibodies against APC (Magenta), H3-Dendra2 fusion protein (green). Yellow dotted circles outline the position of Wnt3a beads. All three patterns are shown: asymmetric, symmetric and reversed asymmetric. **(B)** The corresponding ratios of asymmetric (11.63%), symmetric (85.42%) and reversed asymmetric (2.95%) cell division patterns ( $N= 68$ ) for mESCs with DTT-treated Wnt3a beads. Compared to the percentage using active Wnt3a beads (57.80%, Figure S1B), the asymmetric pattern for mESCs with DTT-treated Wnt3a beads is significantly decreased ( $P < 10^{-4}$  based on Fisher exact probability test). **(C)** Representative images of mitotic (telophase) or post-mitotic cells carrying *H3-Dendra2* transgene cultured with EpiSC medium that promotes differentiation and immunostained with antibodies against  $\alpha$ -Tubulin (green) and Claudin6 (Red). H3-Dendra2 fusion protein (green). Both symmetric and asymmetric patterns are shown. **(D)** The corresponding ratios of asymmetric (20.62%) and symmetric (79.38%) cell division patterns ( $N= 110$ ) for mESCs cultured with EpiSC medium. **(E)** Representative images of mitotic (telophase) or post-mitotic cells carrying *H3-Dendra2* transgene cultured with the EpiSC medium that promotes differentiation and immunostained with antibodies against  $\alpha$ -Tubulin (green) and APC (Magenta). H3-Dendra2 fusion protein (green). Both symmetric and asymmetric patterns are shown. Both asymmetric and symmetric patterns are shown. **(F)** The corresponding ratios of asymmetric (35.96%) and symmetric (64.04%) cell division patterns ( $N= 89$ ) for mESCs cultured with EpiSC medium. The reversed asymmetric distribution pattern is not applicable under this condition without the Wnt3a beads in **(C-D)** and **(E-F)**. The percentages of asymmetric division pattern for mESCs in EpiSC medium were significantly lower than that for mESCs with Wnt3a beads in CM+LIF+2i (Figure S4F *versus* Figure S1B:  $P < 10^{-4}$ ; and Figure S4D *versus* Figure S1D:  $P < 10^{-3}$ , based on Fisher exact probability test). Scale bars in **(A)**, **(C)** and **(E)**: 5  $\mu\text{m}$ .
